# Supplementary material for: Reversible solid to solid transformation in a crystalline state gas–solid reaction under ambient conditions: Fe–N(pyridine) bond formation at the expense of Fe–OH2bond breaking and vice versa
Source: Royal Society of Chemistry journal article supplement (doi:10.1039/c5ce00488h), 2015-01-01
Supplement: c5ce00488h1.pdf [file c5ce00488h1.pdf]

## Electronic Supplementary Information

### Reversible solid to solid transformation in a crystalline state gas-solid reaction at an ambient condition: Fe–N(pyridine) bond formation at the expense of Fe–OH<sub>2</sub> bond breaking and vice versa

Sabbani Supriya and Samar K. Das

#### Crystallographic characterization of [Fe<sub>3</sub>(μ<sub>3</sub>-O)(μ<sub>2</sub>-CH<sub>3</sub>COO)<sub>6</sub>(C<sub>5</sub>H<sub>5</sub>N)<sub>3</sub>]ClO<sub>4</sub> (4)

Even though the quality of the relevant crystals of compound [Fe<sub>3</sub>(μ<sub>3</sub>-O)(μ<sub>2</sub>-CH<sub>3</sub>COO)<sub>6</sub>(C<sub>5</sub>H<sub>5</sub>N)<sub>3</sub>]ClO<sub>4</sub> (4) are never good, we solved the structure. The best R factor we could get is 23 % (even after removing some reflections). The highest peak, is also nearly 3.0 which is due to the scattered electron density of heavy atom Iron. The anion (ClO<sub>4</sub><sup>-</sup>) is highly disordered in the crystal, thus we refined the oxygen atoms of the anion isotropically.

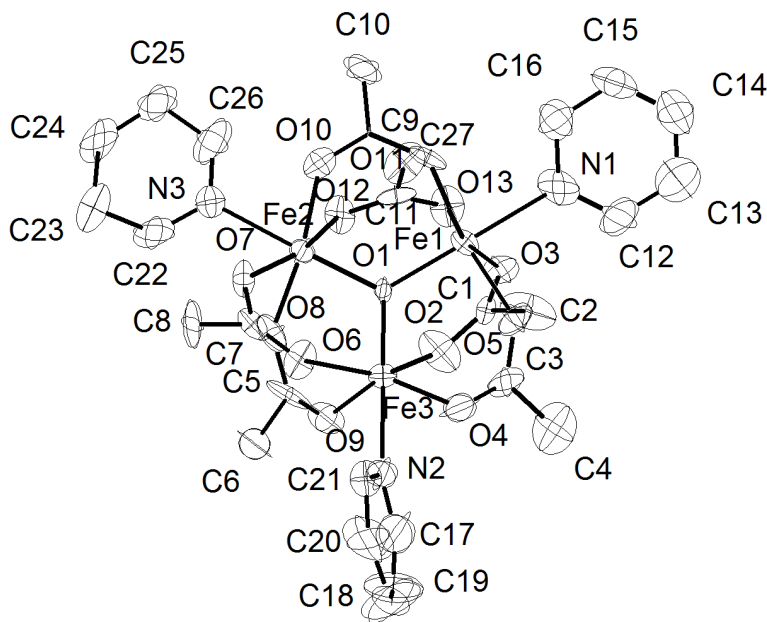

**Fig. S1.** Thermal ellipsoidal plot of [Fe<sub>3</sub>(μ<sub>3</sub>-O)(μ<sub>2</sub>-CH<sub>3</sub>COO)<sub>6</sub>(C<sub>5</sub>H<sub>5</sub>N)<sub>3</sub>]<sup>+</sup> in compound [Fe<sub>3</sub>(μ<sub>3</sub>-O)(μ<sub>2</sub>-CH<sub>3</sub>COO)<sub>6</sub>(C<sub>5</sub>H<sub>5</sub>N)<sub>3</sub>]ClO<sub>4</sub> (4).

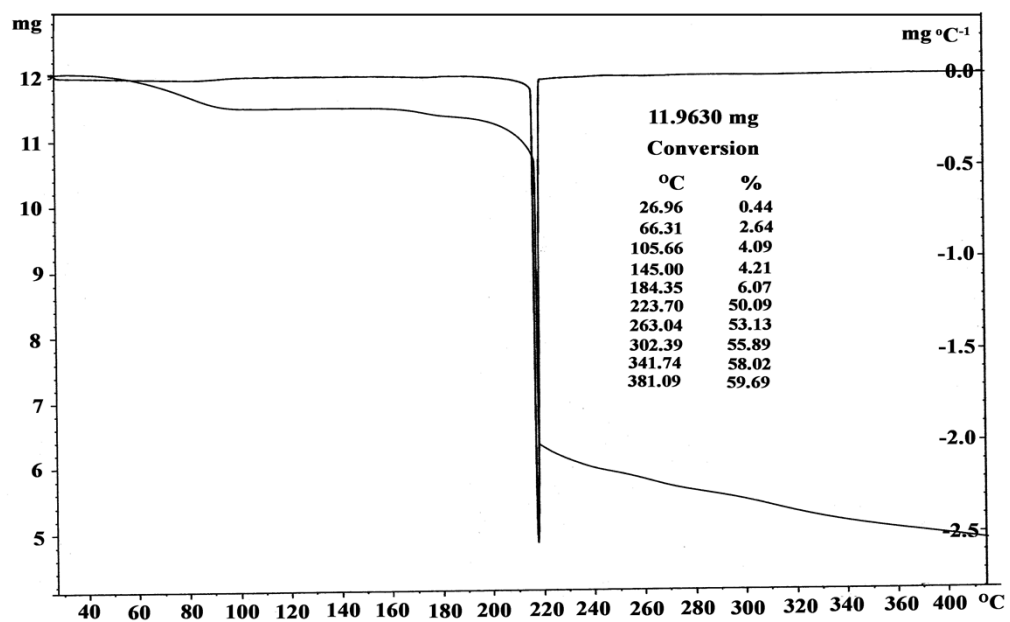

Fig. S2. TGA plot of parent compound  $[\text{Fe}_3(\mu_3\text{-O})(\mu_2\text{-CH}_3\text{COO})_6(\text{C}_5\text{H}_5\text{NO})_2(\text{H}_2\text{O})]\text{ClO}_4 \cdot 3\text{H}_2\text{O}$  (1)

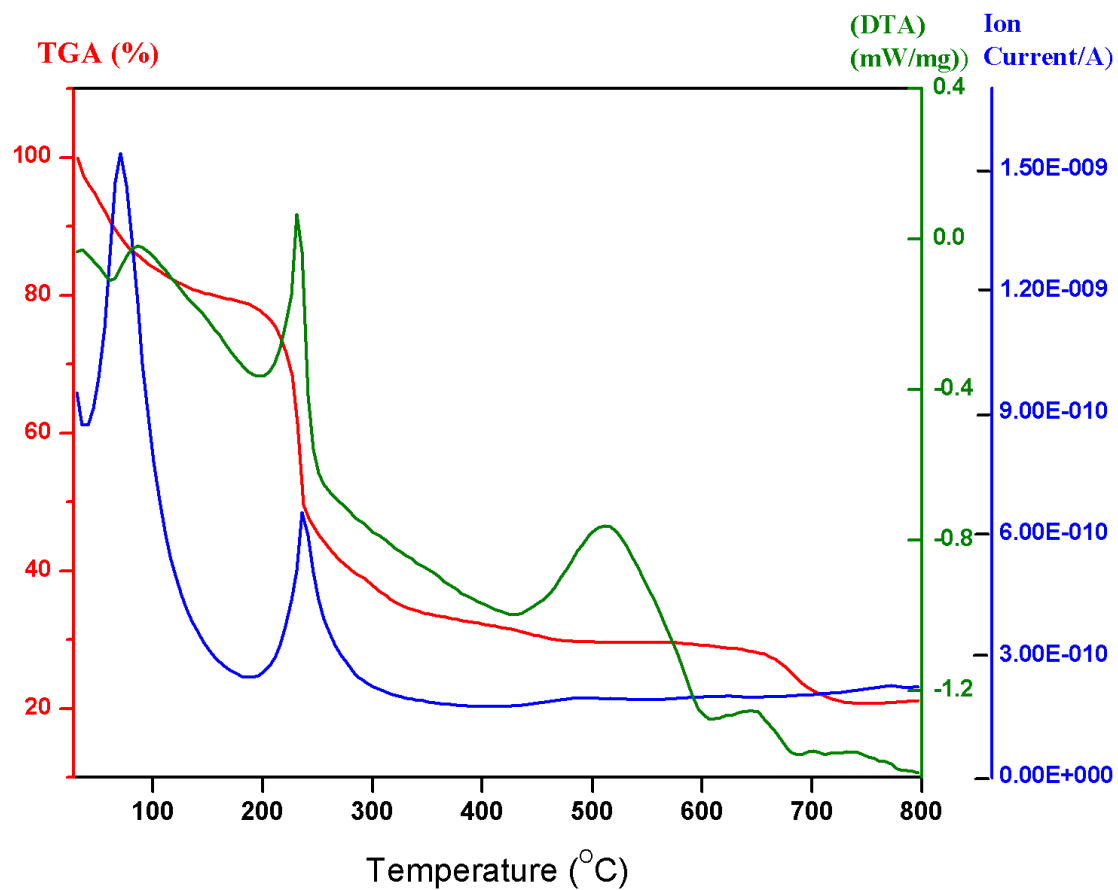

**Fig. S3.** TGA-MS plot of regenerated compound  $[\text{Fe}_3(\mu_3\text{-O})(\mu_2\text{-CH}_3\text{COO})_6(\text{C}_5\text{H}_5\text{NO})_2(\text{H}_2\text{O})]\text{ClO}_4 \cdot 3\text{H}_2\text{O}$  (1). Color code: TGA, Red; DTA, green; MS(18, water), blue.

**Fig. S4.** PXRD patterns of parent compound 1: black, observed and red, simulated from single crystal data.

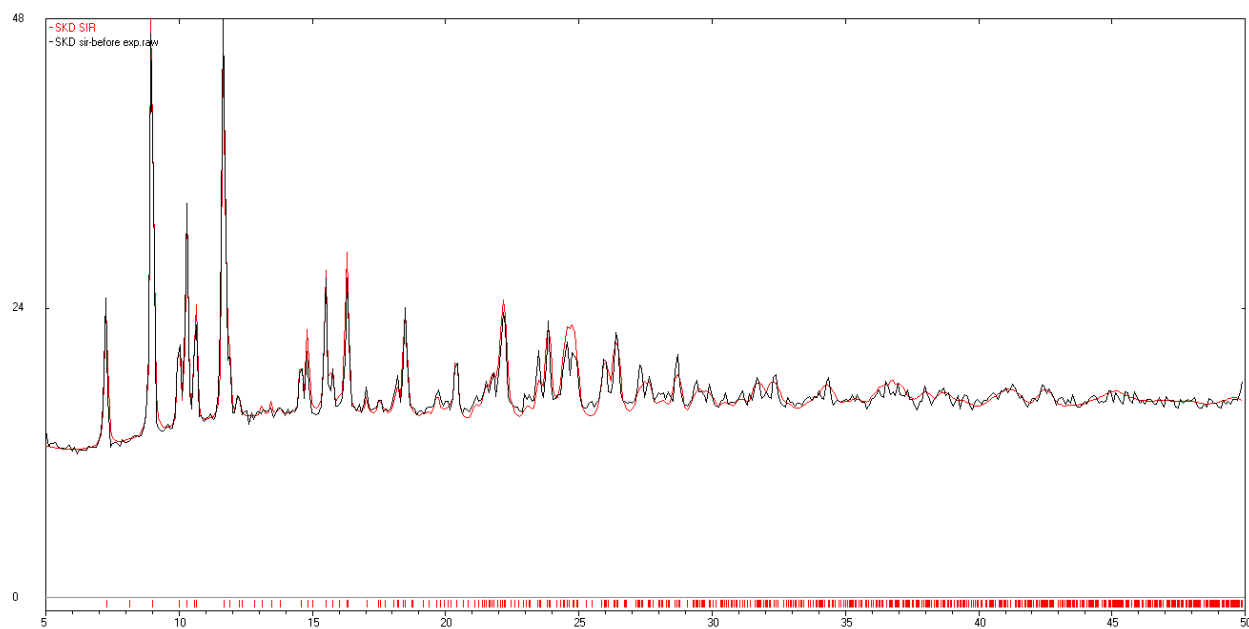

(a)

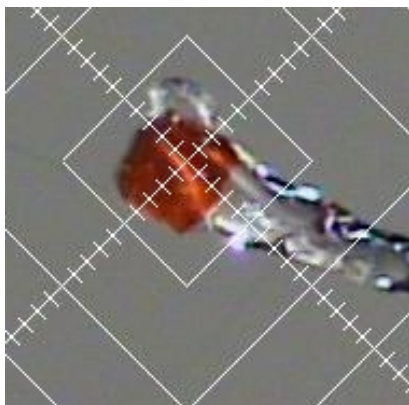

(b)

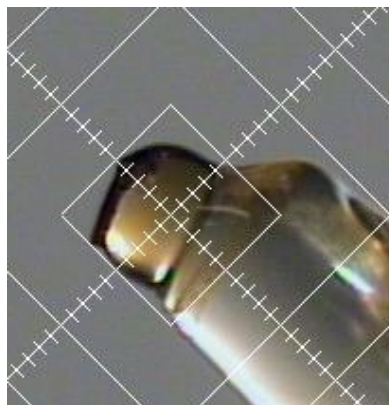

**Fig. S5.** (a) single crystal of compound 1. (b) Same crystal after exposure to pyridine vapour (which loses its single crystallinity).

**Table S1.** Crystal data and structure refinement for compound Compound  $[\text{Fe}_3(\mu_3\text{-O})(\mu_2\text{-CH}_3\text{COO})_6(\text{C}_5\text{H}_5\text{N})_3] \text{ClO}_4$  (**4**)

---

|                                       |                                                                  |
|---------------------------------------|------------------------------------------------------------------|
| Identification code                   | skd175 (compound <b>4</b> )                                      |
| Empirical formula                     | $\text{C}_{27}\text{H}_{33}\text{ClFe}_3\text{N}_3\text{O}_{17}$ |
| Formula weight                        | 874.56                                                           |
| Temperature                           | 298 (2) K                                                        |
| Wavelength                            | 0.71073 Å                                                        |
| Crystal system                        | monoclinic                                                       |
| space group                           | P2(1)/n                                                          |
| Unit cell dimensions                  |                                                                  |
| <i>a</i>                              | 7.9670(16) Å                                                     |
| <i>b</i>                              | 27.574(6) Å                                                      |
| <i>c</i>                              | 19.131(4) Å                                                      |
| $\beta$                               | 90.23(3)°                                                        |
| <i>V</i>                              | 4202.7(15)Å <sup>3</sup>                                         |
| <i>Z</i>                              | 4                                                                |
| $D_{\text{calc}}$                     | 1.382 Mg/m <sup>3</sup>                                          |
| $\mu$                                 | 1.151 mm <sup>-1</sup>                                           |
| F(000)                                | 1788                                                             |
| Crystal size                          | 0.18 × 0.08 × 0.04 mm <sup>3</sup>                               |
| $\theta$ range for<br>Data collection | 1.30 to 26.36°                                                   |
| Reflections collected<br>/ unique     | 41094 / 8362                                                     |
| Refinement method                     | Full-matrix least-squares on F <sup>2</sup>                      |
| Data / restraints / parameters        | 8362 / 24 / 411                                                  |

|                                 |                                     |
|---------------------------------|-------------------------------------|
| Goodness-of-fit on $F^2$        | 1.722                               |
| $R_1/wR_2$ [ $I > 2\sigma(I)$ ] | 0.2369 / 0.5238                     |
| $R_1/wR_2$ (all data)           | 0.2802 / 0.5415                     |
| Largest diff. Peak/hole         | 3.113 / -1.668 e. $\text{\AA}^{-3}$ |
| CCDC                            | 1052815                             |

---

**Table 2.** Bond lengths [ $\text{\AA}$ ] and angles [ $^\circ$ ] for compound  $[\text{Fe}_3(\mu_3\text{-O})(\mu_2\text{-CH}_3\text{COO})_6(\text{C}_5\text{H}_5\text{N})_3]\text{ClO}_4$  (**4**)

---

|                 |            |
|-----------------|------------|
| C (1) - O (2)   | 1.25 (2)   |
| C (1) - O (3)   | 1.27 (2)   |
| C (1) - C (2)   | 1.59 (2)   |
| C (3) - O (4)   | 1.23 (2)   |
| C (3) - O (5)   | 1.27 (2)   |
| C (3) - C (4)   | 1.58 (3)   |
| C (5) - O (9)   | 1.25 (3)   |
| C (5) - O (8)   | 1.28 (3)   |
| C (5) - C (6)   | 1.61 (3)   |
| C (7) - O (6)   | 1.20 (2)   |
| C (7) - O (7)   | 1.30 (2)   |
| C (7) - C (8)   | 1.58 (3)   |
| C (9) - O (10)  | 1.25 (2)   |
| C (9) - O (11)  | 1.292 (19) |
| C (9) - C (10)  | 1.40 (3)   |
| C (11) - O (12) | 1.26 (2)   |
| C (11) - O (13) | 1.28 (2)   |
| C (11) - C (27) | 1.43 (3)   |
| N (1) - C (12)  | 1.3900     |
| N (1) - C (16)  | 1.3900     |
| N (1) - Fe (1)  | 2.188 (9)  |
| C (12) - C (13) | 1.3900     |
| C (13) - C (14) | 1.3900     |
| C (14) - C (15) | 1.3900     |
| C (15) - C (16) | 1.3900     |
| N (2) - C (21)  | 1.4127     |
| N (2) - C (17)  | 1.4201     |
| N (2) - Fe (3)  | 2.181 (9)  |
| C (17) - C (18) | 1.2497     |
| C (18) - C (19) | 1.4011     |
| C (19) - C (20) | 1.4988     |
| C (20) - C (21) | 1.3656     |
| C (22) - N (3)  | 1.29 (3)   |

|                |            |
|----------------|------------|
| C (22) -C (23) | 1.41 (3)   |
| C (23) -C (24) | 1.41 (4)   |
| C (24) -C (25) | 1.40 (4)   |
| C (25) -C (26) | 1.41 (3)   |
| C (26) -N (3)  | 1.26 (3)   |
| Cl (1) -O (17) | 1.27 (5)   |
| Cl (1) -O (16) | 1.36 (7)   |
| Cl (1) -O (14) | 1.37 (5)   |
| Cl (1) -O (15) | 1.90 (6)   |
| Fe (1) -O (1)  | 1.915 (10) |
| Fe (1) -O (13) | 1.992 (12) |
| Fe (1) -O (3)  | 1.996 (12) |
| Fe (1) -O (11) | 2.014 (13) |
| Fe (1) -O (5)  | 2.020 (13) |
| Fe (2) -O (1)  | 1.922 (10) |
| Fe (2) -O (12) | 2.005 (11) |
| Fe (2) -O (8)  | 2.009 (13) |
| Fe (2) -O (7)  | 2.029 (12) |
| Fe (2) -O (10) | 2.042 (14) |
| Fe (2) -N (3)  | 2.202 (17) |
| Fe (3) -O (1)  | 1.888 (10) |
| Fe (3) -O (4)  | 1.974 (15) |
| Fe (3) -O (2)  | 1.977 (14) |
| Fe (3) -O (9)  | 2.002 (14) |
| Fe (3) -O (6)  | 2.042 (12) |

|                        |            |
|------------------------|------------|
| O (2) -C (1) -O (3)    | 120.3 (16) |
| O (2) -C (1) -C (2)    | 120.9 (16) |
| O (3) -C (1) -C (2)    | 118.8 (15) |
| O (4) -C (3) -O (5)    | 123.4 (16) |
| O (4) -C (3) -C (4)    | 119.7 (19) |
| O (5) -C (3) -C (4)    | 116.7 (18) |
| O (9) -C (5) -O (8)    | 125.3 (18) |
| O (9) -C (5) -C (6)    | 120 (2)    |
| O (8) -C (5) -C (6)    | 115 (2)    |
| O (6) -C (7) -O (7)    | 126.8 (16) |
| O (6) -C (7) -C (8)    | 122.8 (17) |
| O (7) -C (7) -C (8)    | 110.3 (17) |
| O (10) -C (9) -O (11)  | 119.6 (15) |
| O (10) -C (9) -C (10)  | 120.5 (16) |
| O (11) -C (9) -C (10)  | 119.1 (17) |
| O (12) -C (11) -O (13) | 119.9 (19) |
| O (12) -C (11) -C (27) | 121 (2)    |
| O (13) -C (11) -C (27) | 119 (2)    |
| C (12) -N (1) -C (16)  | 120.0      |
| C (12) -N (1) -Fe (1)  | 121.0 (2)  |
| C (16) -N (1) -Fe (1)  | 118.8 (2)  |
| N (1) -C (12) -C (13)  | 120.0      |
| C (14) -C (13) -C (12) | 120.0      |
| C (13) -C (14) -C (15) | 120.0      |
| C (16) -C (15) -C (14) | 120.0      |
| C (15) -C (16) -N (1)  | 120.0      |
| C (21) -N (2) -C (17)  | 118.0      |

|                        |           |
|------------------------|-----------|
| C (21) -N (2) -Fe (3)  | 119.3 (4) |
| C (17) -N (2) -Fe (3)  | 122.6 (4) |
| C (18) -C (17) -N (2)  | 117.7     |
| C (17) -C (18) -C (19) | 131.6     |
| C (18) -C (19) -C (20) | 109.0     |
| C (21) -C (20) -C (19) | 120.8     |
| C (20) -C (21) -N (2)  | 120.9     |
| N (3) -C (22) -C (23)  | 126 (2)   |
| C (24) -C (23) -C (22) | 112 (3)   |
| C (25) -C (24) -C (23) | 123 (2)   |
| C (24) -C (25) -C (26) | 114 (2)   |
| N (3) -C (26) -C (25)  | 125 (3)   |
| O (17) -C1 (1) -O (16) | 142 (4)   |
| O (17) -C1 (1) -O (14) | 86 (3)    |
| O (16) -C1 (1) -O (14) | 125 (4)   |
| O (17) -C1 (1) -O (15) | 76 (3)    |
| O (16) -C1 (1) -O (15) | 85 (3)    |
| O (14) -C1 (1) -O (15) | 86 (3)    |
| O (1) -Fe (1) -O (13)  | 96.4 (5)  |
| O (1) -Fe (1) -O (3)   | 95.6 (5)  |
| O (13) -Fe (1) -O (3)  | 168.0 (5) |
| O (1) -Fe (1) -O (11)  | 94.1 (5)  |
| O (13) -Fe (1) -O (11) | 89.9 (6)  |
| O (3) -Fe (1) -O (11)  | 90.1 (5)  |
| O (1) -Fe (1) -O (5)   | 94.2 (5)  |
| O (13) -Fe (1) -O (5)  | 90.2 (6)  |
| O (3) -Fe (1) -O (5)   | 88.0 (5)  |
| O (11) -Fe (1) -O (5)  | 171.6 (5) |
| O (1) -Fe (1) -N (1)   | 179.5 (4) |
| O (13) -Fe (1) -N (1)  | 83.3 (5)  |
| O (3) -Fe (1) -N (1)   | 84.8 (4)  |
| O (11) -Fe (1) -N (1)  | 86.2 (4)  |
| O (5) -Fe (1) -N (1)   | 85.5 (5)  |
| O (1) -Fe (2) -O (12)  | 96.4 (5)  |
| O (1) -Fe (2) -O (8)   | 94.3 (5)  |
| O (12) -Fe (2) -O (8)  | 90.4 (6)  |
| O (1) -Fe (2) -O (7)   | 97.1 (5)  |
| O (12) -Fe (2) -O (7)  | 166.5 (5) |
| O (8) -Fe (2) -O (7)   | 87.8 (6)  |
| O (1) -Fe (2) -O (10)  | 92.9 (5)  |
| O (12) -Fe (2) -O (10) | 92.0 (6)  |
| O (8) -Fe (2) -O (10)  | 172.1 (6) |
| O (7) -Fe (2) -O (10)  | 88.1 (6)  |
| O (1) -Fe (2) -N (3)   | 178.0 (6) |
| O (12) -Fe (2) -N (3)  | 83.1 (6)  |
| O (8) -Fe (2) -N (3)   | 87.6 (6)  |
| O (7) -Fe (2) -N (3)   | 83.5 (6)  |
| O (10) -Fe (2) -N (3)  | 85.2 (6)  |
| O (1) -Fe (3) -O (4)   | 93.6 (5)  |
| O (1) -Fe (3) -O (2)   | 95.8 (5)  |
| O (4) -Fe (3) -O (2)   | 91.8 (7)  |
| O (1) -Fe (3) -O (9)   | 95.0 (5)  |
| O (4) -Fe (3) -O (9)   | 86.4 (7)  |



|                   |           |
|-------------------|-----------|
| O(2)-Fe(3)-O(9)   | 169.2(6)  |
| O(1)-Fe(3)-O(6)   | 95.8(5)   |
| O(4)-Fe(3)-O(6)   | 170.3(6)  |
| O(2)-Fe(3)-O(6)   | 89.9(7)   |
| O(9)-Fe(3)-O(6)   | 90.1(7)   |
| O(1)-Fe(3)-N(2)   | 179.0(5)  |
| O(4)-Fe(3)-N(2)   | 87.2(5)   |
| O(2)-Fe(3)-N(2)   | 83.5(5)   |
| O(9)-Fe(3)-N(2)   | 85.7(5)   |
| O(6)-Fe(3)-N(2)   | 83.5(4)   |
| C(26)-N(3)-C(22)  | 119(2)    |
| C(26)-N(3)-Fe(2)  | 119.4(17) |
| C(22)-N(3)-Fe(2)  | 121.4(14) |
| Fe(3)-O(1)-Fe(1)  | 120.1(5)  |
| Fe(3)-O(1)-Fe(2)  | 120.7(5)  |
| Fe(1)-O(1)-Fe(2)  | 119.2(5)  |
| C(1)-O(2)-Fe(3)   | 135.0(12) |
| C(1)-O(3)-Fe(1)   | 136.6(12) |
| C(3)-O(4)-Fe(3)   | 137.1(13) |
| C(3)-O(5)-Fe(1)   | 131.2(12) |
| C(7)-O(6)-Fe(3)   | 133.1(12) |
| C(7)-O(7)-Fe(2)   | 130.5(11) |
| C(5)-O(8)-Fe(2)   | 132.1(13) |
| C(5)-O(9)-Fe(3)   | 132.9(13) |
| C(9)-O(10)-Fe(2)  | 136.8(11) |
| C(9)-O(11)-Fe(1)  | 135.4(11) |
| C(11)-O(12)-Fe(2) | 135.3(13) |
| C(11)-O(13)-Fe(1) | 136.8(13) |

---
